# Supplementary material for: Antimicrobial Activity of UV-Induced Phenylamides from Rice Leaves
Source: PubMed Central journal article supplement (PMC6271653; doi:10.3390/molecules191118139), 2014-11-06
Supplement: molecules-19-18139-s001.pdf [file molecules-19-18139-s001.pdf]

## Supplementary Materials

**Table S1.**  $^1\text{H}$  (600 MHz) and  $^{13}\text{C}$  (150 MHz) NMR chemical shifts of the isolated compounds from UV-treated rice leaves (in  $\text{CD}_3\text{OD}$ , chemical shifts in ppm).

| No. | 4              |                 | 5              |                 |
|-----|----------------|-----------------|----------------|-----------------|
|     | $^1\text{H}$   | $^{13}\text{C}$ | $^1\text{H}$   | $^{13}\text{C}$ |
| 2   | 7.08 <i>s</i>  | 123.6           | 7.02 <i>s</i>  | 124.4           |
| 3   |                | 113.4           |                | 112.7           |
| 4   |                | 129.1           |                | 129.6           |
| 5   | 7.58 <i>d</i>  | 119.4           | 6.95 <i>d</i>  | 103.7           |
| 6   | 6.99 <i>dd</i> | 119.7           |                | 151.3           |
| 7   | 7.07 <i>dd</i> | 122.5           | 6.65 <i>dd</i> | 112.8           |
| 8   | 7.32 <i>d</i>  | 112.4           | 7.15 <i>d</i>  | 112.5           |
| 9   |                | 138.4           |                | 133.3           |
| 10  | 3.01 <i>t</i>  | 26.5            | 2.92 <i>t</i>  | 26.6            |
| 11  | 3.60 <i>t</i>  | 41.8            | 3.56 <i>t</i>  | 41.6            |
| 1'  |                | 136.5           |                | 127.9           |
| 2'  | 7.53 <i>d</i>  | 129.0           | 7.39 <i>d</i>  | 130.7           |
| 3'  | 7.37 <i>m</i>  | 130.1           | 6.78 <i>d</i>  | 116.9           |
| 4'  | 7.37 <i>m</i>  | 130.9           |                | 160.7           |
| 5'  | 7.37 <i>m</i>  | 130.1           | 6.78 <i>d</i>  | 116.9           |
| 6'  | 7.53 <i>d</i>  | 129.0           | 7.39 <i>d</i>  | 130.7           |
| 7'  | 7.52 <i>d</i>  | 141.7           | 7.44 <i>d</i>  | 141.9           |
| 8'  | 6.58 <i>d</i>  | 122.2           | 6.39 <i>d</i>  | 118.7           |
| 9'  |                | 168.8           |                | 169.4           |

**Table S2.** Sequence of gene specific primers used for semi-quantitative RT-PCR and PCR conditions.

| Gene                      | Primer Sequence                                                 | Annealing Temperature (°C) | Cycle No. |
|---------------------------|-----------------------------------------------------------------|----------------------------|-----------|
| <i>ASa2</i> (Os03g15780)  | 5'-AATCTTGATCGGCATGCAAC-3'<br>5'-CAGCCTCTTGCCTGTACATA-3'        | 56                         | 29        |
| <i>ASβ1</i> (Os04g38950)  | 5'-TGCAGACTGTTCTGGAACCTT-3'<br>5'-TAAGGCCATCTTCAGTCCAC-3'       | 56                         | 29        |
| <i>ASβ2</i> (Os03g50880)  | 5'-GGGAGCTAACTTTGAGGTGT-3'<br>5'-GATCCTTTCCCATGCACAAC-3'        | 56                         | 29        |
| <i>APT</i> (Os03g03450)   | 5'-GACCTACGAAGAGATCGTGG-3'<br>5'-AATCCAACACCCACCTCATT-3'        | 56                         | 29        |
| <i>PAI</i> (Os02g16630)   | 5'-TCAGTTGGTGTCTTTGTGGA-3'<br>5'-TTGAATCCCTTGCCACTTCC-3'        | 56                         | 29        |
| <i>IGPS</i> (Os08g23150)  | 5'-CGGAAGTCAGGAGTGAAGTG-3'<br>5'-TTCCCTTCTCCCTGATGGTA-3'        | 56                         | 29        |
| <i>IGPS</i> (Os09g08130)  | 5'-ATCTGCAAGAACCTCGGAAT-3'<br>5'-CCAAGTCTAGCTGAAAACGGG-3'       | 52                         | 33        |
| <i>TSα</i> (Os03g58320)   | 5'-TTCCTTACGTAGAGACATCCAC-3'<br>5'-CAATGATCACTCCATCTGCAC-3'     | 56                         | 29        |
| <i>TSα</i> (Os07g08430)   | 5'-TAAAAGAAGCCGGTGTCCAT-3'<br>5'-CGTGACCTGCTTGATATCCT-3'        | 56                         | 29        |
| <i>TSβ</i> (Os08g04180)   | 5'-ACATGGGTGCTCAGGATATG-3'<br>5'-CAAGCAACCAAGACATCAGG-3'        | 56                         | 29        |
| <i>AADC1</i> (Os08g04540) | 5'-TGGACTTCATCTCGGACTAC-3'<br>5'-GTCCCCAGAATAACCCAC-3'          | 52                         | 33        |
| <i>AADC2</i> (Os08g04560) | 5'-CGTGTCGACTCCATCAGCA-3'<br>5'-GACGAGGTCCTCGAACGT-3'           | 56                         | 29        |
| <i>Ubi5</i> (Os01g22490)  | 5'-GACTACAACATCCAGAAGGAGTC-3'<br>5'-TCATCTAATAACCAGTTCGATTTC-3' | 54                         | 25        |
